# Supplementary material for: Acidification impacts and acclimation potential of Caribbean benthic foraminifera assemblages in naturally discharging low-pH water
Source: Copernicus journal article supplement (doi:10.5194/bg-19-5269-2022), 2022-11-22
Supplement: Supplementary file 1 [file bg-19-5269-2022-supplement.zip]

Archive with 3 entries (3 files):
- bg-19-5269-2022-supplement-title-page.pdf
- Table S3.xlsx
- Supplement - Tables S1,S2,S4, and S5.docx
