# Supplementary material for: Acidification impacts and acclimation potential of Caribbean benthic foraminifera assemblages in naturally discharging low-pH water
Source: Copernicus journal article supplement (doi:10.5194/bg-19-5269-2022), 2022-11-22
Supplement: Supplementary file 1 [file bg-19-5269-2022-supplement.zip › bg-19-5269-2022-supplement-title-page.pdf]

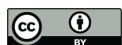

*Supplement of*

**Acidification impacts and acclimation potential of Caribbean benthic foraminifera assemblages in naturally discharging low-pH water**

**Daniel François et al.**

*Correspondence to:* Daniel François (danielfrancois@id.uff.br)

- bg-19-5269-2022-supplement-title-page.pdf
- Supplement - Tables S1,S2,S4, and S5.docx
- Table S3.xlsx

The copyright of individual parts of the supplement might differ from the article licence.
