# Supplementary material for: Acidification impacts and acclimation potential of Caribbean benthic foraminifera assemblages in naturally discharging low-pH water
Source: Copernicus journal article supplement (doi:10.5194/bg-19-5269-2022), 2022-11-22
Supplement: Supplementary file 1 [file bg-19-5269-2022-supplement.zip › Table S3.xlsx]

## Sheet: total
	1	2	3	4	6	7	8	9	10	12	13	14	15	16	17	18	19	20	21	22	23	24	25	44	45	46
Acervulina inhaerens Schultze, 1854	0	0	0	0	0	0	0	0	0	0	0	0	0	0	0	0	0	0	0.7	0	0	0	0	0	0	0
Affinetrina conf, Affinetrina planciana (d'Orbigny, 1839)	0	0	0	0	0	0	0	0	0	1.9	4	4.3	0	0	0	0	0	0	0	0	0	0	0	0	0	0
Affinetrina quadrilateralis (d'Orbigny, 1839)	0	0	0	0	0	0	0	0	0	3.8	8	17.1	25.6	0.7	0.5	0.2	1.9	1.7	5.3	2.8	7	15	6.7	0	0	0
Affinetrina sp	0	0	0	0	0	0	0	0	0	1.9	0	0	4.3	0	0	0	0	0	0	0	0	0	0	0	0	0
Agglutinella compressa El-Nakhal, 1983	0	0	0	0	1.5	1.2	5.1	6.1	6.2	18.8	0	46.9	38.4	0.7	5.6	0	7.5	13.5	2	3.8	0	2.9	0	3	5.1	0
Amphistegina gibbosa d'Orbigny, 1839	12	6	4	8.7	14.2	8.9	53.1	82.3	80	7.5	20	8.5	29.9	8	3.3	3.4	8.5	21.9	0	1.4	1	0	0	12.2	25.4	18.6
Angulogerina sp	0	0	0	0	0	0	0	0	0	0	0	0	0	0	0.2	0.2	0	1.7	0	0	0	0	0	0	10.2	0
Archaias angulatus (Fichtel & Moll, 1798)	49.7	54	41.6	42.3	29.7	11.6	49.5	54.9	61.5	41.4	96	46.9	34.1	42.1	30.6	14.8	59.3	62.3	34.7	27.8	12	8.6	32	36.6	61	42.6
Articulina pacifica Cushman, 1944	0	0	0	0	0	0	0	1.5	0	11.3	28	38.4	68.3	0.3	0.7	0.4	1.9	8.4	0	0	0	0	1.3	3	25.4	4.4
Articulina sp	0	0	0	0	0	0	0	0	0	0	0	0	0	0	0	0	0	0	0	0	0	0	0	0	0	0
Articulina sulcata (Reuss, 1850)	0	0	0	0	0	0	0	0	0	0	0	4.3	0	0	0	0	0	3.4	0	0	0	0	0	0.8	10.2	0
Asterigerina carinata d'Orbigny, 1839	2.3	1.7	0	1	0.8	0.4	10.9	32	41.8	79.1	112	136.5	149.3	6.6	2.4	3.8	29.2	47.2	5.3	1.4	2	2.1	4	12.2	86.3	20.8
Bolivina densipunctata Sellier de Civrieux, 1976	0	0	0	0	0	0.1	0	3	0	0	0	0	0	0	0	0	0	0	0	0	0	0.7	0	0.8	20.3	1.1
Borelis pulchra (d'Orbigny, 1839)	0	0.3	0	0	0.3	0.3	1.5	13.7	11.1	5.6	12	12.8	0	0.3	0.2	0	5.6	0	1.3	0	1	0.7	2.7	2.3	10.2	4.4
Broekina orbitolitoides (Hofker, 1930)	0	0	0	0	0	0.1	1.5	0	0	0	4	0	12.8	0	0	0	0	3.4	0	0	0	0	0	0	0	1.1
Bulimina sp	0	0	0	0	0	0	0	0	0	0	0	0	0	0	0	0	0	0	0	0	0	1.4	2.7	0	0	0
Cancris sp	0	0	0	0	0	0	0	0	0	0	0	0	8.5	0	0	0	0	0	0	0	0	0	0	0	5.1	1.1
Caribeanella conf, polystoma (Bermúdez, 1952)	0.7	0	0	0	0	0	0	0	0	1.9	0	0	8.5	0	0	0.2	0	0	0	0	0	0	0	0.8	5.1	0
Cibicides lobatulus (Walker & Jacob, 1798)	0	0	0	0	0	0	0	0	0	0	0	8.5	0	0	0	0	0	0	0	0	0	0	0	0	0	0
Cibicidoides mundulus (Brady, Parker & Jones, 1888)	0	0	0	0	0.3	0.9	0	0	1.2	1.9	4	4.3	4.3	0	1.6	1.4	0.9	3.4	0	0.5	0.5	0	0	1.5	0	4.4
Cibicidoides sp	0	0	0	0	0	0	0	0	0	0	0	29.9	17.1	0	0	0	0	0	4.7	6.6	5	9.3	26.7	0	10.2	0
Clavulina angularis d'Orbigny, 1826	0	0.7	0.3	2.3	0.3	0.3	5.8	13.7	7.4	7.5	12	12.8	8.5	1.7	0.5	0.6	5.6	8.4	0	0.5	0.5	0.7	0	3	50.8	14.2
Cornuspira involvens (Reuss, 1850)	0	0	0	0	0	0	0	0	0	0	0	0	0	0	0	0	0	0	0.7	0	2	4.3	0	0	20.3	0
Cribroelphidium bartletti (Cushman, 1933)	0	0	0	0	0	0	0	0	0	0	0	8.5	0	0	0	0.4	0	0	0	0	0	0	0	0	0	0
Cribroelphidium excavatum (Terquem, 1875)	0	0	0	0	0	0	0	0	0	0	0	0	0	0	0	0	0	0	0	0	0	0	0	0	0	1.1
Cycloforina contorta (d'Orbigny, 1846)	0	0	0	0	0	0	0	1.5	0	3.8	12	0	0	0	0	0.4	0	1.7	0	0	0	0.7	1.3	0	5.1	2.2
Cyclorbiculina compressa (d'Orbigny, 1839)	5.7	6.7	8.5	8.3	2	1.6	7.3	6.1	4.9	13.2	0	0	0	1	0.9	0.6	0	1.7	0	0.9	0	0	0	11.4	20.3	6.6
Cymbaloporetta sp	0	0	0	0	0	0	0	0	2.5	1.9	0	17.1	34.1	0	0.2	0.2	2.8	3.4	0	0	1.5	1.4	9.3	0	25.4	1.1
Cymbaloporetta squammosa (d'Orbigny, 1839)	0	0.7	0	0.7	0	0	0	1.5	1.2	1.9	4	4.3	4.3	1	0	0.2	1.9	1.7	0	0	0.5	0	0	0	0	1.1
Elphidium conf Elphidium williamsome ou fijense	0	0	0	0	0	0	0	0	0	0	0	0	4.3	0	0	0	0	0	0	0	0	0	0	0	0	1.1
Elphidium discoidale (d'Orbigny, 1839)	0	0	0	0	0	0	0.7	0	2.5	9.4	20	4.3	25.6	0	0.7	0.2	3.8	6.7	0	0	0	0	0	0.8	10.2	2.2
Elphidium excavatum	0	0	0	0	0	0	0	0	0	0	0	12.8	21.3	0	0	0	0	0	0.7	0	0	0	2.7	0.8	0	0
Euthymonacha polita (Chapman, 1900)	0	0	0	0	0	0.1	0	1.5	1.2	5.6	4	21.3	29.9	0	0	0	0.9	5.1	0	0	0.5	0	2.7	0	10.2	0
Fissurina sp	0	0	0	0	0	0	0	0	0	0	0	0	0	0	0	0	0	0	0	0	0	3.6	2.7	0	10.2	0
Floresina sp	0	0	0	0	0	0.1	0	0	0	0	0	0	0	0	0	0.2	0	0	0	0	0	0.7	0	0	0	0
Foraminifera chave	0	0	0	0	0	0	0	0	0	0	0	4.3	0	0	0	0	0	0	0	0	0	0	0	0	0	0
Globigerinella calida (Parker, 1962)	0	0	0	0	0	0	0	0	0	0	0	0	0	0	0	0	0	0	0	0	0	0	0	0	0	1.1
Globigerinoides ruber (d'Orbigny, 1839)	0	0	0	0	0	0	0	0	0	1.9	0	0	0	0	0	0	0.9	1.7	0	0	0	0	0	0	0	0
Hauerina ornatissima (Karrer, 1868)	0	0	0	0	0	0	0	0	0	0	0	0	4.3	0	0	0	0	0	0	0.5	0	0	0	0	0	0
Heterostegina depressa d'Orbigny, 1826	0.3	0.3	1.6	1	0	0.1	0.7	1.5	0	0	0	0	0	0	0	0	0	0	0	0	0	0	0	0	0	1.1
Lachlanella carinata (d'Orbigny, 1839)	0	0	0	1.3	0	0	5.8	3	1.2	3.8	16	0	12.8	2.8	0.2	0.4	9.4	1.7	1.3	3.8	4.5	1.4	5.3	1.5	0	0
Laevipeneroplis proteus (d'Orbigny, 1839)	0	0	0.3	0.3	0	0.4	1.5	12.2	11.1	15.1	68	85.3	72.5	0.7	1.9	0	6.6	21.9	5.3	4.2	1.5	5.7	12	7.6	45.7	15.3
Melonis ?	0	0	0	0	0	0	0	1.5	0	0	0	0	0	0.3	0	0.2	0	0	0	0	0	0	0	0.8	0	0
Miliolinela sp,13	0	0	0	0	0	0	0	0	0	0	0	0	4.3	0	0	0	0	0	0	0	0	0	0	0	0	0
Miliolinella circularis (Bornemann, 1855)	0	0	0	0	0	0	0	3	1.2	0	16	21.3	17.1	0	0.2	0.2	0	3.4	0	0	0.5	0	1.3	0	0	1.1
Miliolinella elongata Kruit, 1955	0	0	0	0	0	0.1	0	0	0	0	12	8.5	38.4	0	0.7	0.2	0	1.7	2.7	3.8	2.5	7.1	5.3	4.6	81.3	8.7
Miliolinella sp,11	0	0	0	0	0	0	0	0	0	0	0	0	0	0	0	0	0	0	0	0	0	0	0	0	0	1.1
Miliolinella sp,a	0	0	0	0	0	0	0	0	0	0	0	0	8.5	0	0	0	0	0	0	0	0	0	0	3.8	0	0
Miliolinella subrotunda (Montagu, 1803)	0	0	0	0	0	0	0	0	0	11.3	8	42.7	59.7	0	0	0.8	0	8.4	0	0	0	0	0	0	0	6.6
Miliolinella webbiana_x000D_ (d'Orbigny, 1839)	0	0	0	0	0	0.1	0.7	3	0	0	8	12.8	17.1	0	0.2	0	0	0	1.3	0	0	0	0	0.8	20.3	4.4
Millettiana sp	0	0	0	0	0	0	0	0	0	0	0	17.1	12.8	0	0	0	0	0	0	0	0	0	0	0	0	0
Miniacina miniacea (Pallas, 1766)	0	0	0	0	0	0	0	0	0	0	0	0	0	0	0	0	0	0	0	0	0	0	0	0	0	2.2
Neoconorbina terquemi (Rzehak, 1888)	0	0	0	0	0	0	0	9.1	0	0	0	4.3	4.3	0	0	0	0	0	0.7	0	0	0	0	0	10.2	4.4
Nonionella sp	0	0	0	0	0	0	0	0	0	0	0	0	0	0	0	0	0.9	0	0	0	0	0	0	0	0	0
Nonionoides grateloupi (d'Orbigny, 1839)	0	0	0	0	0	0	0	0	0	1.9	4	4.3	25.6	0	0	0	0	0	0	0.5	0	0	0	0	10.2	2.2
Peneroplis (Peneroplis) carinatus d'Orbigny, 1839	0.3	0	0	0	0.3	0.1	2.9	4.6	3.7	11.3	12	0	21.3	1.7	0	0.4	4.7	11.8	0	1.4	1	0	0	1.5	0	5.5
Peneroplis pertustus (Forskal, 1775)	0	0	0	0	0	0.1	3.6	6.1	6.2	26.4	44	46.9	51.2	0	0	0.8	3.8	11.8	4	1.4	5.5	5.7	16	2.3	30.5	7.6
Peneroplis planatus (Fichtel & Moll, 1798)	0	0	0	0	0	0	0	1.5	1.2	1.9	8	38.4	72.5	0	0	1.2	0	1.7	2	0	0	0	1.3	1.5	10.2	2.2
Planispirillina inaequalis (Brady, 1879)	0	0	0	0	0	0.1	0	0	0	0	0	0	0	0	0	0	0	0	0	0	0	0	0	0	0	0
Planogypsina acervalis (Brady, 1884)	0	0	0	0.3	0.2	0	0.7	1.5	0	11.3	4	46.9	106.7	0.3	0	0	0	1.7	2	0	0.5	0.7	0	5.3	0	1.1
Planorbulina mediterranensis d'Orbigny, 1826	0	0	0	0.3	0.5	1.3	0	3	0	5.6	4	0	8.5	0	0.2	0.8	1.9	0	0.7	0.5	0	0.7	0	0	20.3	2.2
Pseudohauerina diversa (Cushman, 1946)	0	0	0	0	0.2	0	0	0	0	5.6	0	21.3	12.8	0	0	0	0	6.7	0	0	0	0	0	0	0	0
Pseudohauerinella conf, Pseudohauerinella dissidens	0.3	0	0	0	0	0	0	0	0	0	0	0	0	0	0	0	0	0	0	0	0	0	0	0	0	0
Pseudolachlanella eburnea (d'Orbigny, 1839)	0.3	0	0	0	0	0	0	0	0	0	0	0	4.3	0	0	0	0	0	0	0	0	0	0	0	0	0
Pseudolachlanella slitella Langer, 1992	0	0	0	0	0	0	0	0	1.2	0	4	0	0	0	0	0	0	0	0	0	0	0	0	0.8	10.2	0
Pseudotriloculina limbata (d'Orbigny in Fornasini, 1905)	0	0	0	0	0	0	0	0	0	1.9	12	38.4	55.5	0	0	0.6	0	10.1	0	0	0	0	4	0	0	1.1
Pseudotriloculina linneiana (d'Orbigny, 1839)	0.3	0	0	0	0.2	0	1.5	6.1	0	1.9	8	12.8	17.1	0	0	0	0	1.7	0.7	4.2	4.5	2.1	6.7	1.5	10.2	5.5
Pseudotriloculina sp,	0	0	0	0	0	0	0.7	0	0	0	4	34.1	25.6	0	0	0.4	0	0	2	0	0	0	0	1.5	0	6.6
Pseudotriloculina sp,1	0	0	0	0	0	0	0	0	0	0	0	8.5	0	0	0	0	0	0	0	0	0	0	0	0	0	0
Pyrgo conf, Pyrgo elongata	0	0	0	0	0	0	0	1.5	1.2	0	0	12.8	0	0	0	0	0	0	0	0	0	0	0	0	0	1.1
Pyrgo sp,1	0	0	0	0	0	0.1	0.7	3	2.5	0	4	21.3	0	0.3	0.5	0	1.9	3.4	0	0	0	0.7	0	2.3	10.2	3.3
Quinqueloculina bosciana d'Orbigny, 1839	0	0	0	0	0	0	0	3	1.2	30.1	32	64	46.9	0.3	0	0.6	0	13.5	4	1.9	2.5	16.4	9.3	3	40.6	3.3
Quinqueloculina carinatastriata (Wiesner, 1923)	0	0	0	0	0	0	0	1.5	0	5.6	0	0	4.3	0	0	0	0	0	2	2.8	9	13.6	25.3	0	0	0
Quinqueloculina cf, berthelotiana	0.3	0	0	0	0	0.1	0.7	0	0	1.9	0	8.5	0	0	0	0	0.9	3.4	3.3	4.7	3.5	10	17.3	0	0	3.3
Quinqueloculina cf, zengui	0	0	0	0	0	0	0	0	0	0	0	0	46.9	0	0	0	0	0	0	0	0	1.4	0	1.5	0	0
Quinqueloculina conf, Quinqueloculina bradyana	0	0	0	0	0	0	0	0	0	0	0	4.3	8.5	0	0	0	0	0	0	0	0	0	0	0	0	0
Quinqueloculina conf, Quinqueloculina distorqueata	0	0	0	0	0	0	0	0	0	0	0	21.3	29.9	0.7	0.2	3.6	3.8	6.7	0	0	1	1.4	1.3	3	0	6.6
Quinqueloculina disparilis d’Orbigny, 1826	4	2	1.1	3.7	1.5	1.3	17.5	39.6	29.5	15.1	36	0	38.4	10.8	2.8	1.4	16.9	18.5	0.7	0	0	0	1.3	10.7	76.2	34.9
Quinqueloculina jugosa (Cushman, 1944)	0	0	0	0	0	0	0	0	0	0	4	0	0	0	0	0	0	0	0.7	0	0	2.9	0	2.3	30.5	0
Quinqueloculina laevigata (d'Orbigny, 1839)	0	0	0	0	0	0	0	0	0	0	4	0	0	0	0	0	0	0	0	0	0	0	2.7	0	5.1	1.1
Quinqueloculina parkeri (Brady, 1881)	0	0	0	0	0	0	0	0	0	0	0	0	4.3	0	0	0	0	0	3.3	0	0	0	0	0	0	0
Quinqueloculina polygona d'Orbigny, 1839	0	0	0	0	0	0	0	0	0	1.9	0	8.5	8.5	0	0.2	0	0	0	0	0	0	0	0	0	0	0
Quinqueloculina seminulum (Linnaeus, 1758)	0	0	0	0	0	0	0	0	0	0	0	0	0	0	0	0	0	0	0.7	0	0	0	0	0.8	0	0
Quinqueloculina sp,12	0	0	0	0	0	0	0	0	0	0	0	0	0	0	0	0	0.9	0	0	0	0	0	0	0	0	0
Quinqueloculina sp,13	0	0	0	0	0	0	0	0	0	0	0	0	0	0	0	0.2	0	0	0	0	0	0	0	0	0	0
Quinqueloculina sp,22	0	0	0	0	0	0	0	0	0	0	0	0	0	0	0	0	0	0	0	0	0	0	0	0.8	0	0
Quinqueloculina sp,22	0	0	0	0	0	0	0	0	0	1.9	0	0	0	0	0	0.2	0	0	0	0	0	0	0	0	0	0
Quinqueloculina sp,28	0	0	0	0	0	0	0	0	0	0	0	4.3	0	0	0	0	0	0	0	0	0	0.7	0	0	0	0
Quinqueloculina sp,7	0	0	0	0	0	0	0	0	0	0	0	0	0	0	0	0	0	1.7	0	0	0	0	0	0.8	0	0
Quinqueloculina subpoeyana Cushman, 1922	0	0	0	0	0	0	0	0	0	18.8	48	110.9	55.5	0	0	1.8	10.4	13.5	2	0	0	6.4	0	3.8	25.4	4.4
Quinqueloculina tricarinata d'Orbigny, 1839	9	16.3	12	14.3	1.5	0.4	0.7	1.5	1.2	0	0	0	0	0	0.9	0.4	0	0	0	0	0.5	0	0	1.5	10.2	12
Quinqueloculina tropicalis Cushman, 1924	0	0	0	0	0	0	0	0	0	5.6	0	29.9	34.1	0	0	0	0	0	0	0	0	0	2.7	0	0	2.2
Quinqueloculina cuvieriana (d'Orbigny, 1826)	0	0	0	0.3	0	0	0	3	0	5.6	0	0	0	0	0.7	0.4	2.8	0	0	0	0	0	0	1.5	35.6	8.7
Reophax sp,1	0	0	0	0	0	0	0	0	0	0	0	0	0	0	0	0	0.9	0	0	0	0	0	0	0	0	0
Reophax sp,2	0	0	0	0	0	0	0	0	0	0	0	0	0	0	0	0	0	1.7	0	0	0	0	0	0	0	0
Reussella atlantica Cushman, 1947	0	0	0	0	0	0	0	0	0	0	0	0	8.5	0	0	0	0	0	0	0	0	0	0	0	0	0
Rosalina cf, floridana (Cushman, 1922)	0	0	0	0	0	0.1	0.7	4.6	1.2	5.6	36	64	72.5	0.3	0.5	1.8	0.9	6.7	0	0.5	1.5	2.1	4	3.8	55.9	10.9
Rosalina globularis d'Orbigny, 1826	0.3	0	0	0	0	0.3	0	3	1.2	3.8	16	29.9	29.9	1	0.5	1.8	5.6	3.4	0	0.5	0.5	2.9	0	0	5.1	0
Rosalina sp	0	0	0	0	0	0	0	0	0	3.8	0	0	0	0	0	0	1.9	0	0	0	1	0	0	0	10.2	0
Rotorbinella rosea (d'Orbigny in Guérin-Méneville, 1832)	21	7	6.4	20.3	2.3	2	28.4	57.9	55.4	39.5	100	38.4	38.4	18.8	3.3	1.8	41.4	3.4	88	46.1	37.5	29.3	109.3	32	162.5	75.4
Rotorbis auberii (d'Orbigny, 18239)	0	0.3	0	0.3	0.2	0.5	3.6	33.5	17.2	26.4	68	59.7	115.2	1.4	1.9	1.6	22.6	52.2	3.3	0.9	0	0	2.7	11.4	61	51.3
Schlumbergerina alveoliniformis (Brady, 1879)	0	0	0	0	0.2	0	0.7	9.1	0	9.4	0	0	0	1.7	0	0	2.8	5.1	3.3	0	0	5	14.7	2.3	5.1	0
Sigmavirgulina tortuosa (Brady, 1881)	0	0	0	0	0	0	0	0	0	0	0	0	0	0	0	0	0.9	3.4	0	0	0	0	0	0	5.1	0
Sigmoihauerina involuta (Cushman, 1946)	0	0	0	0	0	0	0	0	0	16.9	4	21.3	21.3	0	0.2	0.2	0.9	0	0	0	0	0	1.3	0	0	0
Sigmoilinita conf, Sigmoilinita costata Schlumberger	0	0	0	0	0	0	0.7	0	2.5	0	4	12.8	17.1	0	0	0	1.9	1.7	0	0	0	0	0	0	10.2	1.1
Siphogenerina raphana (Parker & Jones, 1865)	0	0	0	0	0	0	0	0	0	0	0	0	0	0	0	0	0	0	0.7	0	0	0	0	0	5.1	3.3
Siphonaperta agglutinans (d’Orbigny)	0	0	0	0	0	0	0	0	0	0	0	0	0	0	0	0	5.6	5.1	0	2.4	3.5	0.7	8	0	0	3.3
Siphonaperta distorqueata (Cushman)	0	0	0	0	0.5	0.1	0	0	0	0	0	0	0	0	0.5	0	0	0	0	0	0	0	0	0	0	0
Siphonaperta macbeathi Vella, 1957	1.3	1	1.1	0.7	0.2	0.9	0.7	4.6	4.9	0	16	0	0	2.1	0.5	0	3.8	0	1.3	1.9	1	0	4	0	0	0
Siphonina bradyana Cushman, 1927	0	0	0	0	0	0	0	0	0	0	0	0	0	0.3	0	0	0	0	0	0	0	0	0	0	0	0
Siphonina reticulata (Cžjžek, 1848)	0	0	0	0.3	0	0	0	0	0	0	0	4.3	0	0	0	0	0	1.7	0.7	0	0	0	0	0	20.3	1.1
Sorites marginalis (Lamarck, 1816)	0	0	0	0.3	0	0	0	13.7	1.2	11.3	12	76.8	76.8	0	0	0.6	0.9	3.4	6	3.8	7.5	4.3	13.3	1.5	15.2	3.3
Spirolina acicularis (Barst, 1791)	0	0	0	0	0	0	0	0	0	3.8	0	12.8	8.5	0	0	0	0.9	0	0	0	0	1.4	0	0	0	0
Spiroloculina acescata (Cushman, 1932)	0	0	0	0	0	0	0	0	0	0	0	0	0	0	0	0	0	0	0	0	0.5	0	0	0	0	0
Spiroloculina antillarum d'Orbigny, 1839	0.3	0	0	0	0	0	0.7	0	2.5	5.6	4	38.4	17.1	0.7	0	0.6	0	3.4	0.7	0	0	2.9	4	0.8	5.1	3.3
Spiroloculina corrugata Cushman & Todd, 1944	0	0	0	0	0	0	0	1.5	1.2	5.6	44	0	4.3	0	0	0.4	0.9	0	0.7	6.1	8	0	4	0.8	0	3.3
Spirosigmoilina sp	0	0	0	0	0	0	0	0	0	0	0	8.5	25.6	0	0	0	0	0	0	0	0	0	2.7	0	0	0
Strebloides advena (Cushman, 1922)	0	0	0	0	0	0	0	3	2.5	0	0	21.3	21.3	0	0	0.2	0	1.7	0	0	0	0	0	0	0	1.1
Textularia agglutinans (d'Orbigny, 1839)	0	0	0	0.3	0	0.1	5.8	12.2	9.8	24.5	28	21.3	38.4	1	0	0.2	5.6	5.1	1.3	0.5	1.5	1.4	0	0.8	30.5	5.5
Textularia sp,1	0	0	0	0	0	0	0	0	0	0	0	4.3	0	0	0	0	0	0	0	0	0	0	0	0	0	0
Tretomphalus bulloides (d'Orbigny, 1839)	0	0	0	0	0	0	0	0	0	0	4	17.1	0	0	0.2	0	0	1.7	0	0	0	0	0	0.8	5.1	2.2
Triloculina bertheliniana (Brady, 1884)	0	0	0	0	0	0	0	0	0	0	0	0	0	0	0	0	0	0	0	0	0	0	0	0	0	1.1
Triloculina oblonga (Montagu, 1803)	0	0	0	0	0	0	0	0	0	0	0	29.9	46.9	0	0	0	0	0	0	0	0	2.1	0	1.5	0	0
Triloculina sp	0	0	0	0	0	0	0	0	0	0	0	25.6	4.3	0	0	0	0	0	0	0	0	0.7	0	0	15.2	1.1
Triloculina sp,1	0	0	0	0	0	0	0	0	3.7	0	0	0	0	0	0	0	0	0	0	0	0	0	0	0	0	0
Triloculina tricarinata (d'Orbigny in Deshayes, 1832)	0	0	0	0	0	0	0	0	0	0	8	12.8	21.3	0	0	0.2	0	1.7	1.3	0	0	0.7	1.3	0	0	0
Triloculina trigonula (Lamarck, 1804)	0	0	0	0	0	0	0	0	0	0	4	0	4.3	0	0.2	0.2	0	1.7	0	0	0	0	0	0	0	0
Trisegmentina compressa Wiesner, 1923	0	0	0	0	0	0	0	3	2.5	0	20	38.4	34.1	0	0	1.2	0	5.1	0	0	0.5	1.4	2.7	0	5.1	6.6
Trochulina sp	0	0	0	0	0	0	0	0	0	1.9	24	110.9	102.4	0	0	0.8	1.9	0	7.3	0.5	4.5	5	13.3	0.8	0	0
Unidentified agglutinated foraminifera 1	0	0	0	0	0	0	0	0	0	0	0	0	0	0	0	0	0	0	0	0	0	0	0	0.8	0	0
Unidentified agglutinated foraminifera 2	0	0	0	0	0	0	0	0	0	0	0	0	0	0	0	0	0	1.7	0	0	0	0	0	0	0	0
Unidentified agglutinated foraminifera 3	0	0	0	0	0	0	0	0	0	1.9	0	0	0	0	0	0	0	3.4	0.7	0	0	0	0	0	15.2	0
Unidentified calcareous foraminifera 1	0	0	0	0	0	0	0	0	0	0	0	0	0	0	0	0	0	0	0	0	0	0	0	0	0	0
Unidentified calcareous foraminifera 2	0.3	0	0	0	0	0	0	0	2.5	0	0	0	0	0	0	0	0	6.7	0	0	0	0	0	0	0	1.1
Unidentified calcareous foraminifera 3	0	0	0	0	0	0	0	0	0	0	0	0	0	0	0	0	0.9	0	0	0	0	0	0	0.8	0	0
Unidentified calcareous foraminifera 4	0	0	0	0	0	0	0	0	0	0	0	0	0	0	0	0.2	0	0	0	0	0	0	0	0	10.2	0
Unidentified calcareous foraminifera 6	0	0	0	0	0	0	0	0	0	0	0	0	0	0	0	0.2	0	0	0	0	0	0	0	0	0	0
Unidentified calcareous foraminifera 5	0	0	0	0	0	0	0	0	0	0	0	0	0	0	0	0	1.9	0	0	0	0	0	0	0	0	0
Valvulina oviedoiana (d'Orbigny, 1839a)	5.3	6.3	3.2	7	5.7	1.9	5.8	6.1	3.7	3.8	0	4.3	0	3.5	3.5	2.6	8.5	0	0.7	0.5	0	0	0	12.2	40.6	7.6
Varidentella cf, neostriatula (Thalmann, 1950)	0	0	0	0	0	0	0	0	0	0	0	55.5	0	0	0	0	0	0	0	0	0	0	0	0	0	0
Varidentella sp	0	0	0	0	0	0	0	0	1.2	0	0	0	0	0	0	0	0	0	0	0	0	0	8	0	0	0

## Sheet: 3%
Affinetrina quadrilateralis (d'Orbigny, 1839)	0	0	0	0	0	0	0	0	0	3.8	8	17.1	25.6	0.7	0.5	0.2	1.9	1.7	5.3	2.8	7	15	6.7	0	0	0
Agglutinella compressa El-Nakhal, 1983	0	0	0	0	1.5	1.2	5.1	6.1	6.2	18.8	0	46.9	38.4	0.7	5.6	0	7.5	13.5	2	3.8	0	2.9	0	3	5.1	0
Amphistegina gibbosa d'Orbigny, 1839	12	6	4	8.7	14.2	8.9	53.1	82.3	80	7.5	20	8.5	29.9	8	3.3	3.4	8.5	21.9	0	1.4	1	0	0	12.2	25.4	18.6
Archaias angulatus (Fichtel & Moll, 1798)	49.7	54	41.6	42.3	29.7	11.6	49.5	54.9	61.5	41.4	96	46.9	34.1	42.1	30.6	14.8	59.3	62.3	34.7	27.8	12	8.6	32	36.6	61	42.6
Articulina pacifica Cushman, 1944	0	0	0	0	0	0	0	1.5	0	11.3	28	38.4	68.3	0.3	0.7	0.4	1.9	8.4	0	0	0	0	1.3	3	25.4	4.4
Asterigerina carinata d'Orbigny, 1839	2.3	1.7	0	1	0.8	0.4	10.9	32	41.8	79.1	112	136.5	149.3	6.6	2.4	3.8	29.2	47.2	5.3	1.4	2	2.1	4	12.2	86.3	20.8
Cibicidoides sp	0	0	0	0	0	0	0	0	0	0	0	29.9	17.1	0	0	0	0	0	4.7	6.6	5	9.3	26.7	0	10.2	0
Clavulina angularis d'Orbigny, 1826	0	0.7	0.3	2.3	0.3	0.3	5.8	13.7	7.4	7.5	12	12.8	8.5	1.7	0.5	0.6	5.6	8.4	0	0.5	0.5	0.7	0	3	50.8	14.2
Cyclorbiculina compressa (d'Orbigny, 1839)	5.7	6.7	8.5	8.3	2	1.6	7.3	6.1	4.9	13.2	0	0	0	1	0.9	0.6	0	1.7	0	0.9	0	0	0	11.4	20.3	6.6
Lachlanella carinata (d'Orbigny, 1839)	0	0	0	1.3	0	0	5.8	3	1.2	3.8	16	0	12.8	2.8	0.2	0.4	9.4	1.7	1.3	3.8	4.5	1.4	5.3	1.5	0	0
Laevipeneroplis proteus (d'Orbigny, 1839)	0	0	0.3	0.3	0	0.4	1.5	12.2	11.1	15.1	68	85.3	72.5	0.7	1.9	0	6.6	21.9	5.3	4.2	1.5	5.7	12	7.6	45.7	15.3
Miliolinella elongata Kruit, 1955	0	0	0	0	0	0.1	0	0	0	0	12	8.5	38.4	0	0.7	0.2	0	1.7	2.7	3.8	2.5	7.1	5.3	4.6	81.3	8.7
Peneroplis pertustus (Forskal, 1775)	0	0	0	0	0	0.1	3.6	6.1	6.2	26.4	44	46.9	51.2	0	0	0.8	3.8	11.8	4	1.4	5.5	5.7	16	2.3	30.5	7.6
Peneroplis planatus (Fichtel & Moll, 1798)	0	0	0	0	0	0	0	1.5	1.2	1.9	8	38.4	72.5	0	0	1.2	0	1.7	2	0	0	0	1.3	1.5	10.2	2.2
Planogypsina acervalis (Brady, 1884)	0	0	0	0.3	0.2	0	0.7	1.5	0	11.3	4	46.9	106.7	0.3	0	0	0	1.7	2	0	0.5	0.7	0	5.3	0	1.1
Planorbulina mediterranensis d'Orbigny, 1826	0	0	0	0.3	0.5	1.3	0	3	0	5.6	4	0	8.5	0	0.2	0.8	1.9	0	0.7	0.5	0	0.7	0	0	20.3	2.2
Pseudotriloculina linneiana (d'Orbigny, 1839)	0.3	0	0	0	0.2	0	1.5	6.1	0	1.9	8	12.8	17.1	0	0	0	0	1.7	0.7	4.2	4.5	2.1	6.7	1.5	10.2	5.5
Quinqueloculina bosciana d'Orbigny, 1839	0	0	0	0	0	0	0	3	1.2	30.1	32	64	46.9	0.3	0	0.6	0	13.5	4	1.9	2.5	16.4	9.3	3	40.6	3.3
Quinqueloculina carinatastriata (Wiesner, 1923)	0	0	0	0	0	0	0	1.5	0	5.6	0	0	4.3	0	0	0	0	0	2	2.8	9	13.6	25.3	0	0	0
Quinqueloculina cf, berthelotiana	0.3	0	0	0	0	0.1	0.7	0	0	1.9	0	8.5	0	0	0	0	0.9	3.4	3.3	4.7	3.5	10	17.3	0	0	3.3
Quinqueloculina conf, Quinqueloculina distorqueata	0	0	0	0	0	0	0	0	0	0	0	21.3	29.9	0.7	0.2	3.6	3.8	6.7	0	0	1	1.4	1.3	3	0	6.6
Quinqueloculina disparilis d’Orbigny, 1826	4	2	1.1	3.7	1.5	1.3	17.5	39.6	29.5	15.1	36	0	38.4	10.8	2.8	1.4	16.9	18.5	0.7	0	0	0	1.3	10.7	76.2	34.9
Quinqueloculina subpoeyana Cushman, 1922	0	0	0	0	0	0	0	0	0	18.8	48	110.9	55.5	0	0	1.8	10.4	13.5	2	0	0	6.4	0	3.8	25.4	4.4
Quinqueloculina tricarinata d'Orbigny, 1839	9	16.3	12	14.3	1.5	0.4	0.7	1.5	1.2	0	0	0	0	0	0.9	0.4	0	0	0	0	0.5	0	0	1.5	10.2	12
Rosalina cf, floridana (Cushman, 1922)	0	0	0	0	0	0.1	0.7	4.6	1.2	5.6	36	64	72.5	0.3	0.5	1.8	0.9	6.7	0	0.5	1.5	2.1	4	3.8	55.9	10.9
Rosalina globularis d'Orbigny, 1826	0.3	0	0	0	0	0.3	0	3	1.2	3.8	16	29.9	29.9	1	0.5	1.8	5.6	3.4	0	0.5	0.5	2.9	0	0	5.1	0
Rotorbinella rosea (d'Orbigny in Guérin-Méneville, 1832)	21	7	6.4	20.3	2.3	2	28.4	57.9	55.4	39.5	100	38.4	38.4	18.8	3.3	1.8	41.4	3.4	88	46.1	37.5	29.3	109.3	32	162.5	75.4
Rotorbis auberii (d'Orbigny, 18239)	0	0.3	0	0.3	0.2	0.5	3.6	33.5	17.2	26.4	68	59.7	115.2	1.4	1.9	1.6	22.6	52.2	3.3	0.9	0	0	2.7	11.4	61	51.3
Schlumbergerina alveoliniformis (Brady, 1879)	0	0	0	0	0.2	0	0.7	9.1	0	9.4	0	0	0	1.7	0	0	2.8	5.1	3.3	0	0	5	14.7	2.3	5.1	0
Sorites marginalis (Lamarck, 1816)	0	0	0	0.3	0	0	0	13.7	1.2	11.3	12	76.8	76.8	0	0	0.6	0.9	3.4	6	3.8	7.5	4.3	13.3	1.5	15.2	3.3
Spiroloculina corrugata Cushman & Todd, 1944	0	0	0	0	0	0	0	1.5	1.2	5.6	44	0	4.3	0	0	0.4	0.9	0	0.7	6.1	8	0	4	0.8	0	3.3
Textularia agglutinans (d'Orbigny, 1839)	0	0	0	0.3	0	0.1	5.8	12.2	9.8	24.5	28	21.3	38.4	1	0	0.2	5.6	5.1	1.3	0.5	1.5	1.4	0	0.8	30.5	5.5
Trochulina sp	0	0	0	0	0	0	0	0	0	1.9	24	110.9	102.4	0	0	0.8	1.9	0	7.3	0.5	4.5	5	13.3	0.8	0	0
Valvulina oviedoiana (d'Orbigny, 1839a)	5.3	6.3	3.2	7	5.7	1.9	5.8	6.1	3.7	3.8	0	4.3	0	3.5	3.5	2.6	8.5	0	0.7	0.5	0	0	0	12.2	40.6	7.6
